# Supplementary material for: Local structure and ion storage properties of vanadate cathode materials regulated by the pre-alkalization
Source: Royal Society of Chemistry journal article supplement (doi:10.1039/d2ta04490k), 2022-01-01
Supplement: d2ta04490k1.pdf [file d2ta04490k1.pdf]

## Supporting Information

# Local Structure and Ions Storage Properties of Vanadate Cathode Materials Regulated by the Pre-Alkalization

Xiaoqiang Shan,<sup>a</sup> SaeWon Kim,<sup>a</sup> Milinda Abeykoon,<sup>b</sup> Gihan Kwon,<sup>b</sup> Daniel Olds,<sup>b</sup> and Xiaowei Teng<sup>a, c\*</sup>

<sup>a</sup>Department of Chemical Engineering, University of New Hampshire, Durham, New Hampshire 03824, USA

<sup>b</sup>National Synchrotron Light Source II, Brookhaven National Laboratory, Upton, New York 11973, USA

<sup>c</sup>Department of Chemical Engineering, Worcester Polytechnic Institute, Worcester, Massachusetts 01609, USA

## Supplementary Figures:

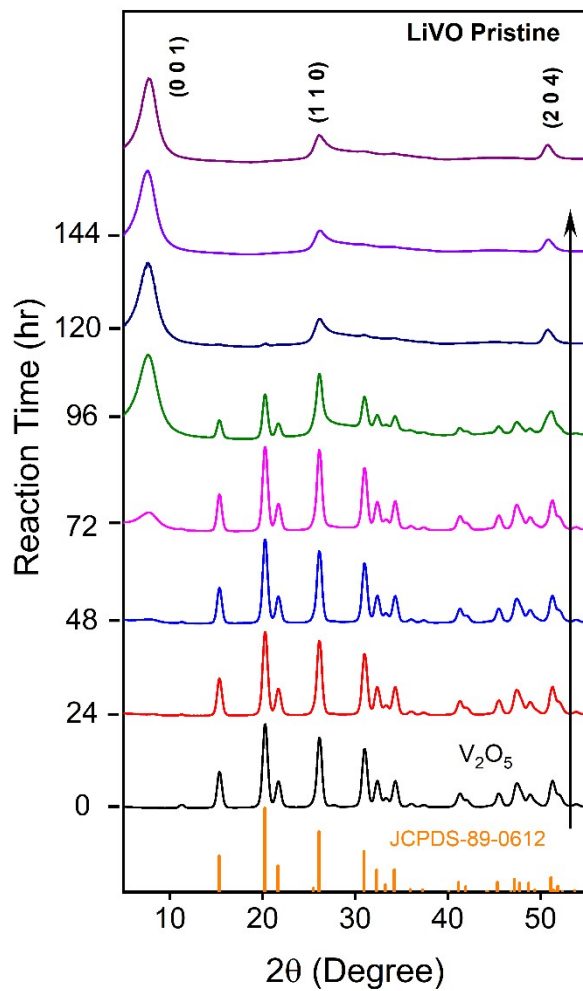

**Figure S1.** Lithiation of  $V_2O_5$  bulk material using 0.5 M  $Li_2SO_4$  solution at room temperature.

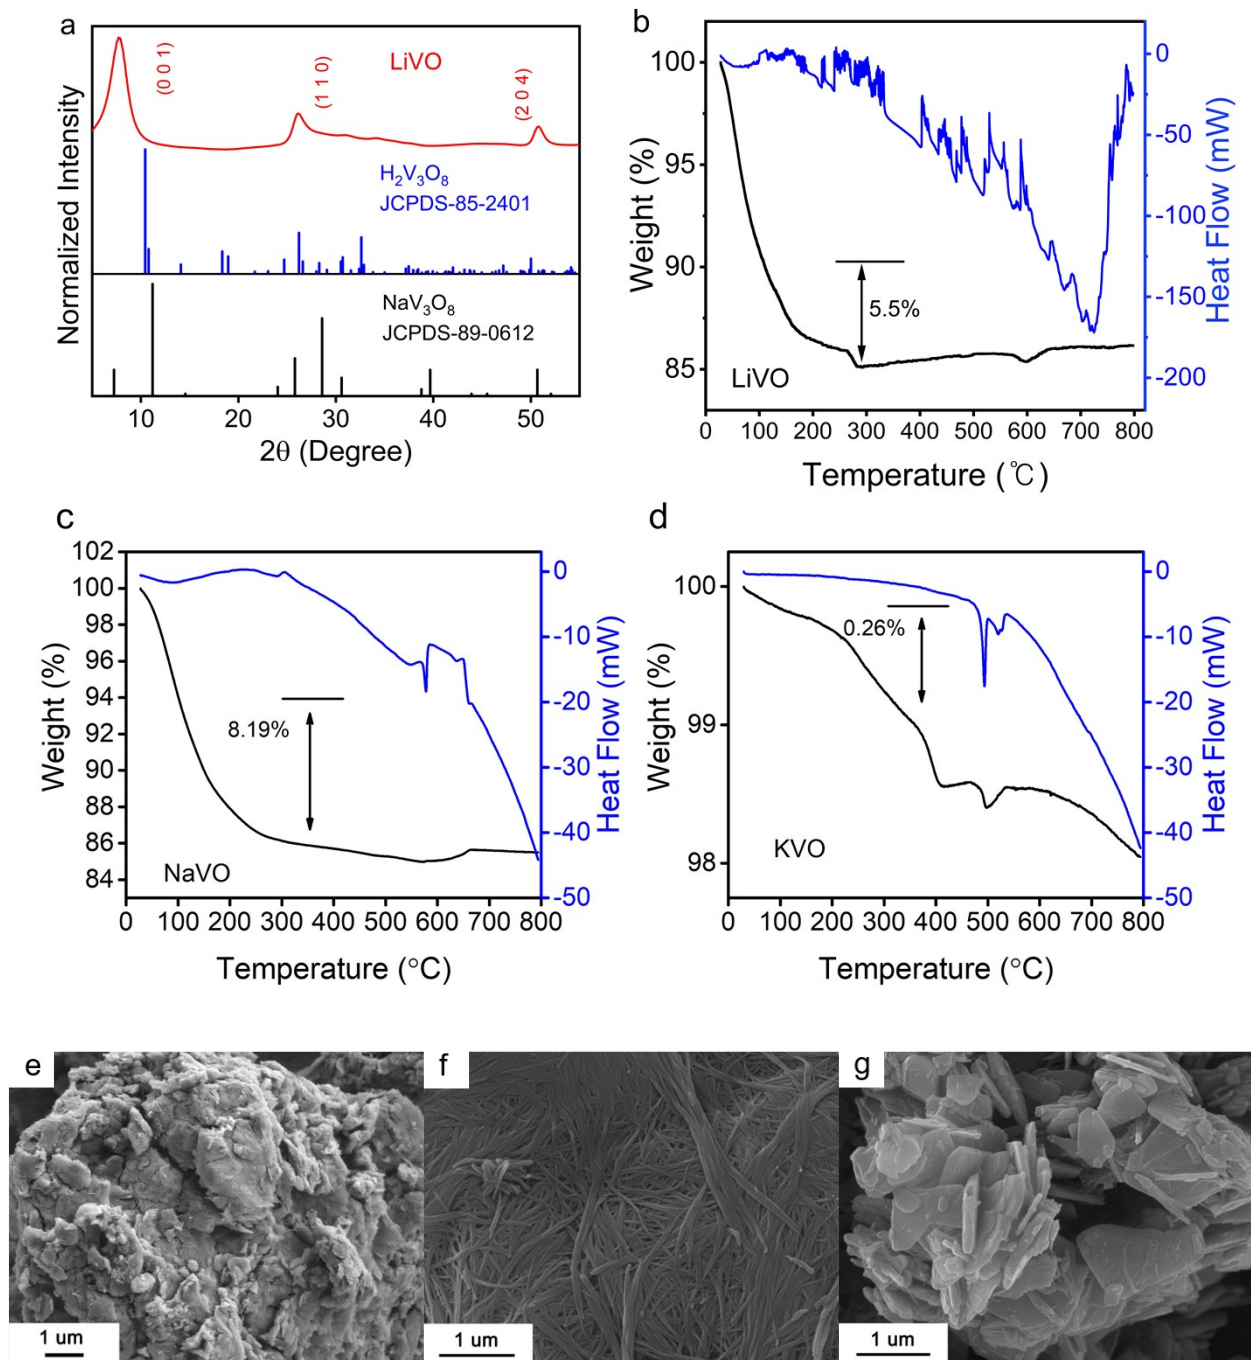

**Figure S2.** (a) LiVO compared to standards; TGA and DSC data of (b) LiVO, (c) NaVO, and (d) KVO; SEM images of (e) LiVO, (f) NaVO, and (g) KVO.

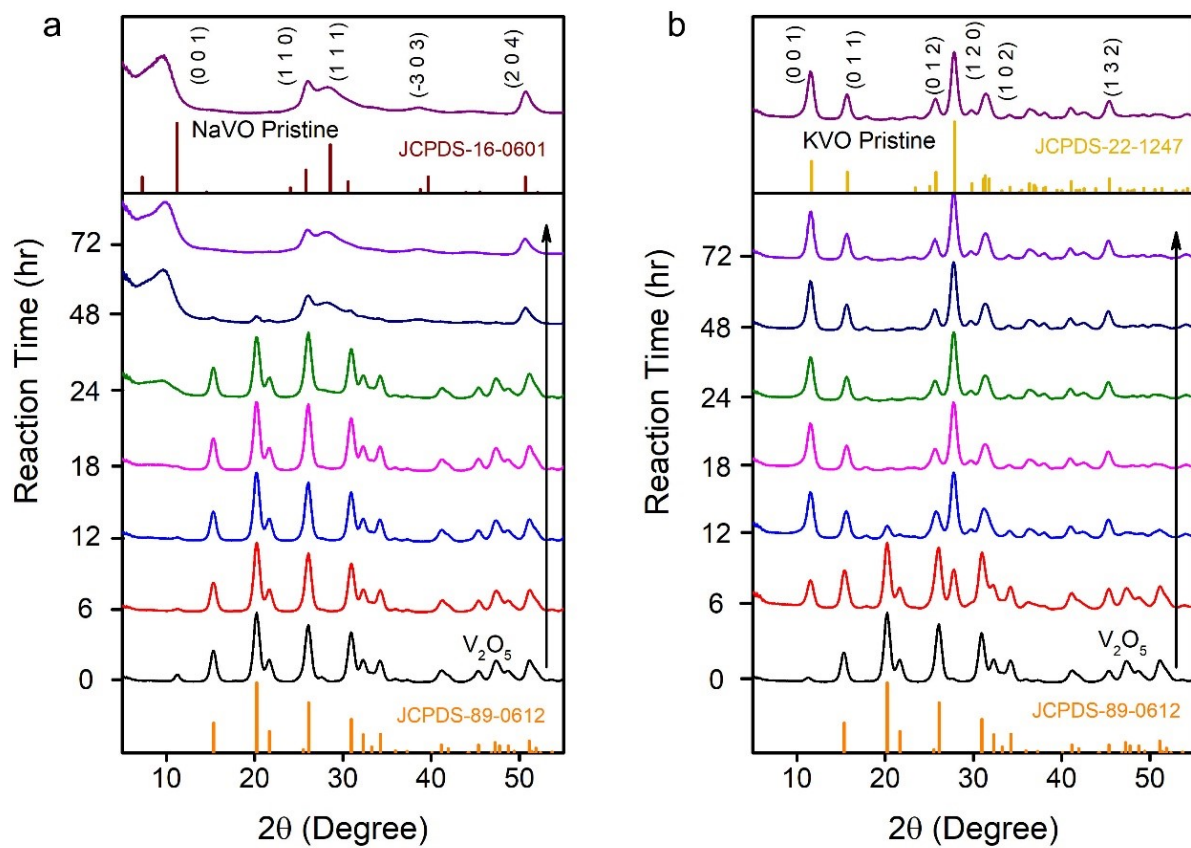

**Figure S3.** (a) Pre-sodiation using 0.5 M Na<sub>2</sub>SO<sub>4</sub> and (b) pre-potassiation using 0.5 M K<sub>2</sub>SO<sub>4</sub> solution of V<sub>2</sub>O<sub>5</sub> bulk material at room temperature.

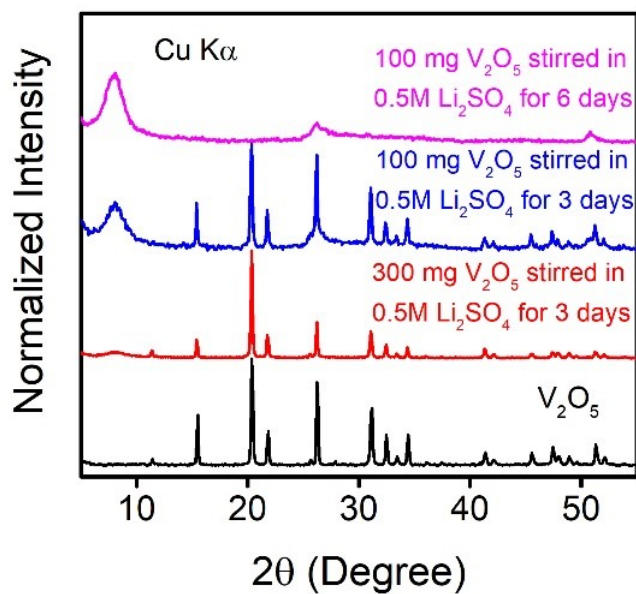

**Figure S4.** V<sub>2</sub>O<sub>5</sub> was stirred in 0.5 M Li<sub>2</sub>SO<sub>4</sub> for the various duration of time and various amounts of added V<sub>2</sub>O<sub>5</sub>. The NaVO and KVO are obtained by stirring 300 mg of V<sub>2</sub>O<sub>5</sub> in 0.5 M Na<sub>2</sub>SO<sub>4</sub> or K<sub>2</sub>SO<sub>4</sub> solution for three days.

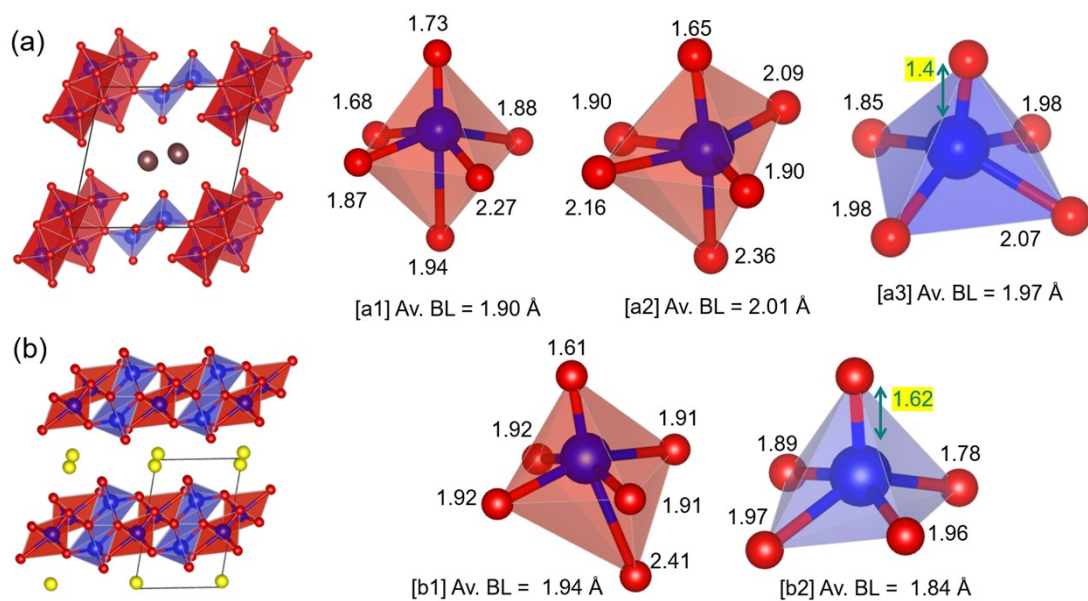

**Figure S5.** Crystal structures and building polyhedral units of (a) NaVO with [a1, 2]  $\text{VO}_6$  octahedral and [a3]  $\text{VO}_5$  bipyramid units; (b) KVO with [b1]  $\text{VO}_6$  and [b2] bipyramid building units. ( $\text{VO}_5$  pyramid in blue and  $\text{VO}_6$  octahedral in red, green: Li, blue: V, red: O).

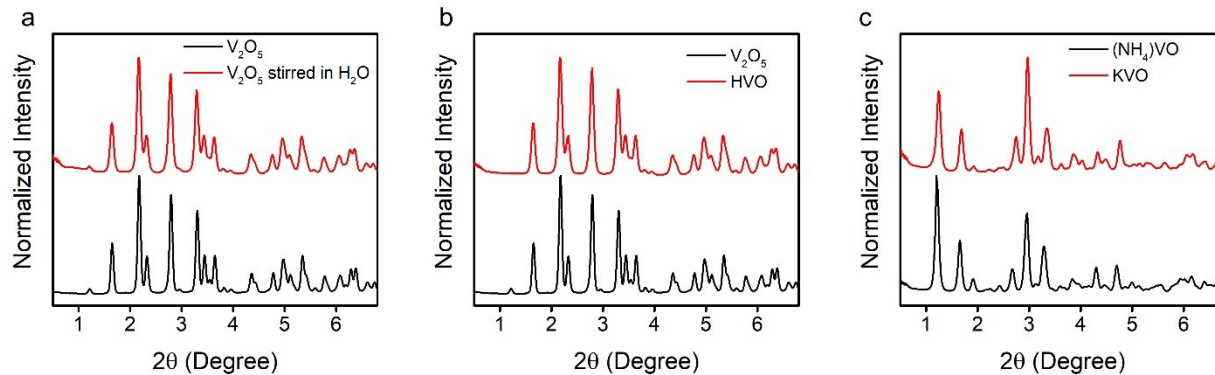

**Figure S6.** After stirring in different solutions, we obtained the final V<sub>2</sub>O<sub>5</sub>, HVO, and (NH<sub>4</sub>)VO products. (a) V<sub>2</sub>O<sub>5</sub> bulk stirred in water as a control sample; (b) V<sub>2</sub>O<sub>5</sub> stirred in 0.5 M H<sub>2</sub>SO<sub>4</sub>; (c) V<sub>2</sub>O<sub>5</sub> stirred in 0.5 M (NH<sub>4</sub>)<sub>2</sub>SO<sub>4</sub> compared to that obtained in K<sub>2</sub>SO<sub>4</sub> solution.

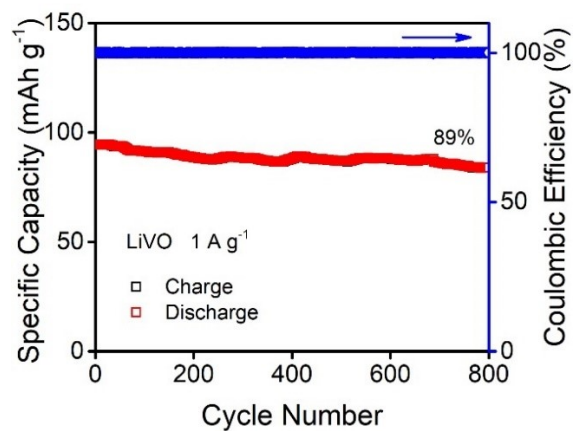

**Figure S7.** Long-term cycling performance of LiVO at a current density of 1 A g<sup>-1</sup> for 800 cycles.

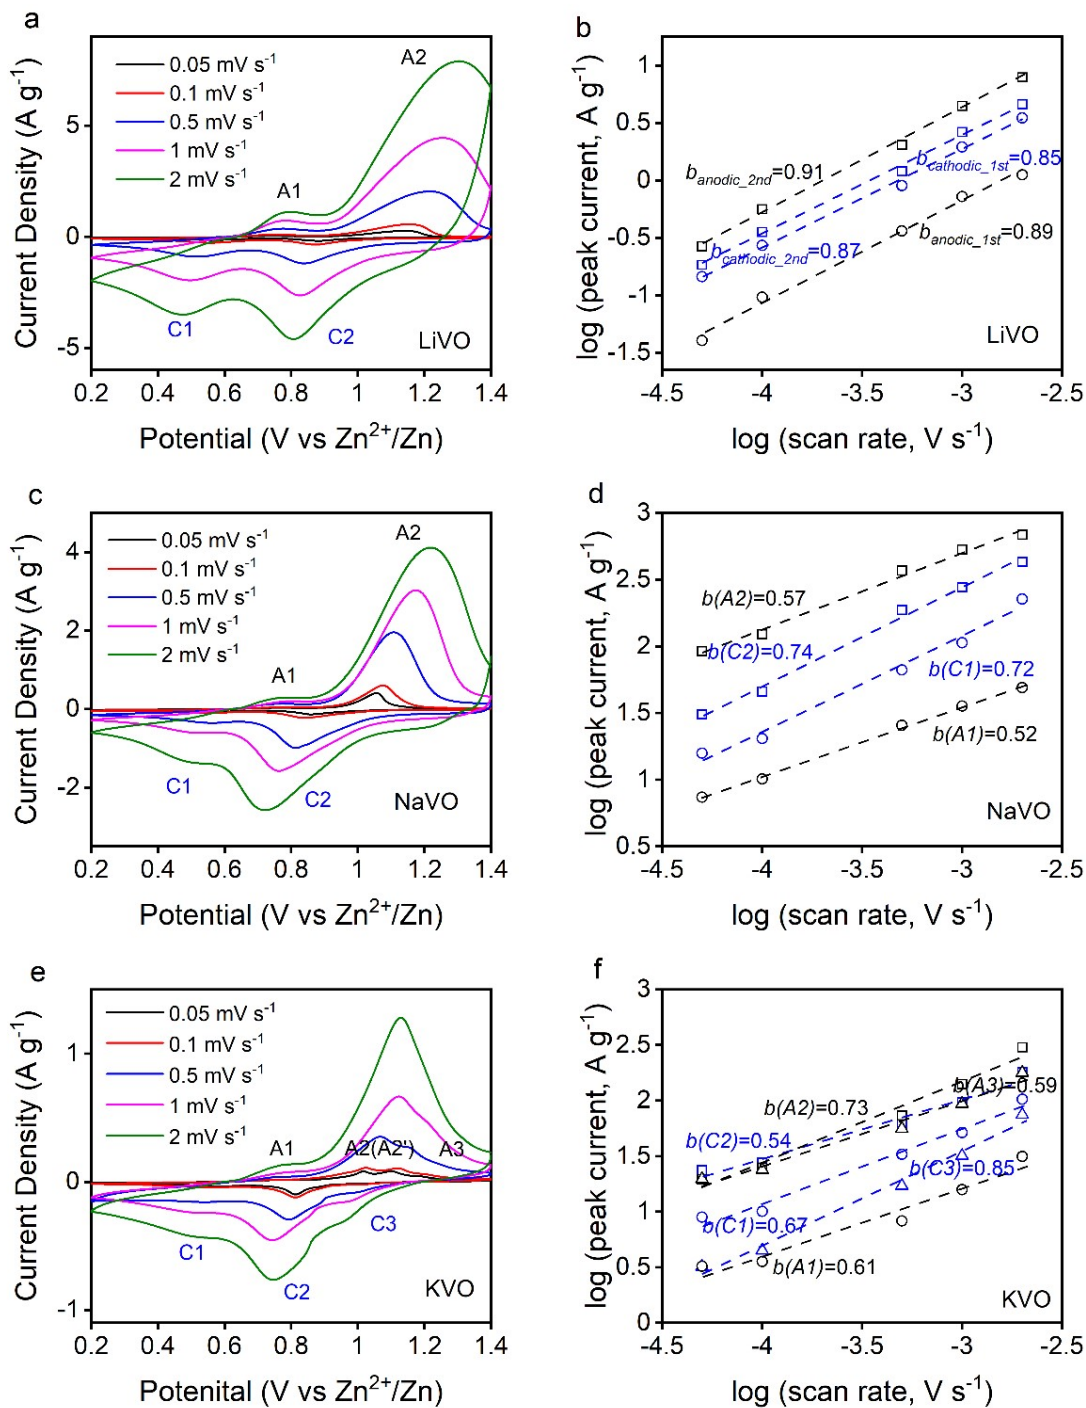

**Figure S8.** (a, c, e) CVs of LiVO, NaVO, and KVO at scan rates from 0.05 mV s<sup>-1</sup> to 2 mV s<sup>-1</sup>; (b, d, f) Kinetics analysis with b-values of LiVO, NaVO, and KVO. C1 and A1 are the first redox peaks of cathodic and anodic scan (empty circles), and C2 and A2 are the second ones (open squares).



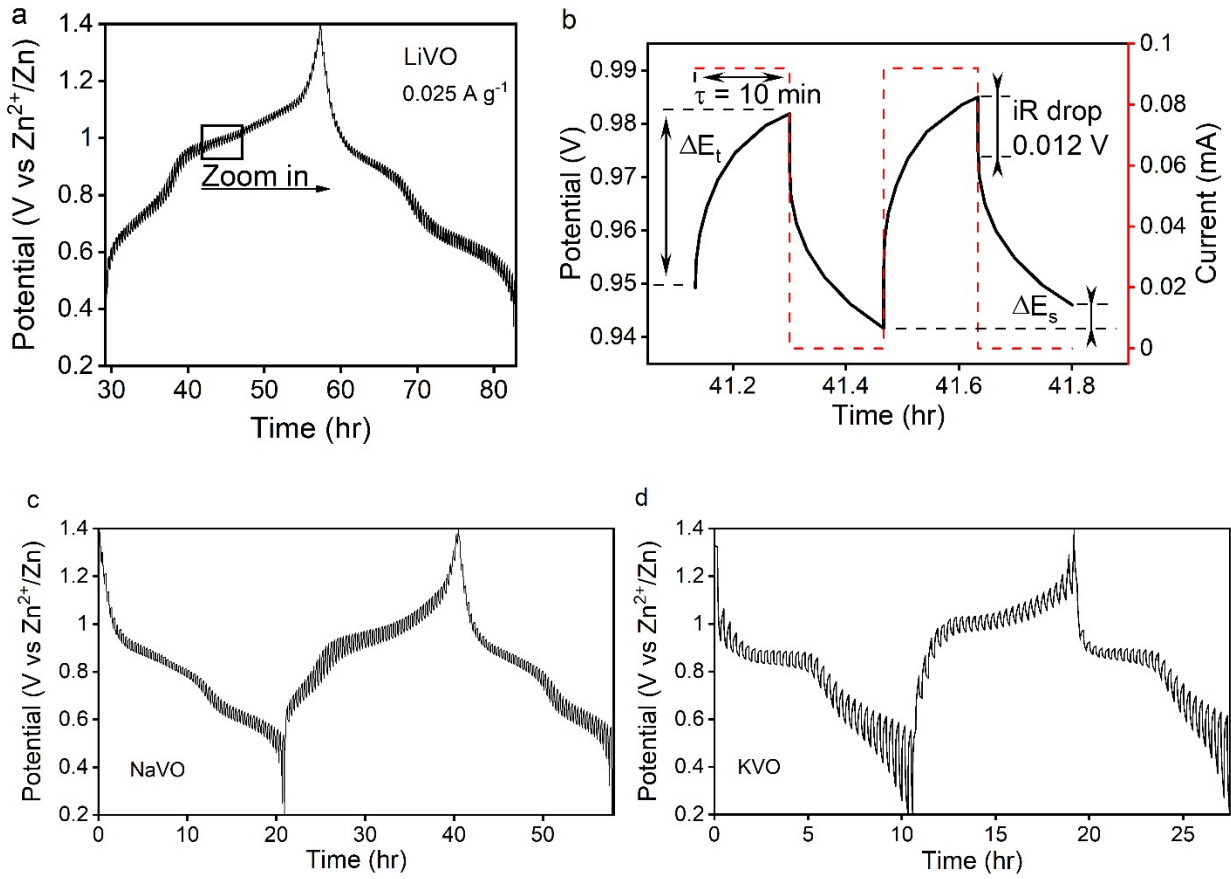

**Figure S9.** GITT test of (a) LiVO with (b) zoom-in potential curve with values, (c) NaVO and (c) KVO at a current density of 0.025 A g<sup>-1</sup>.

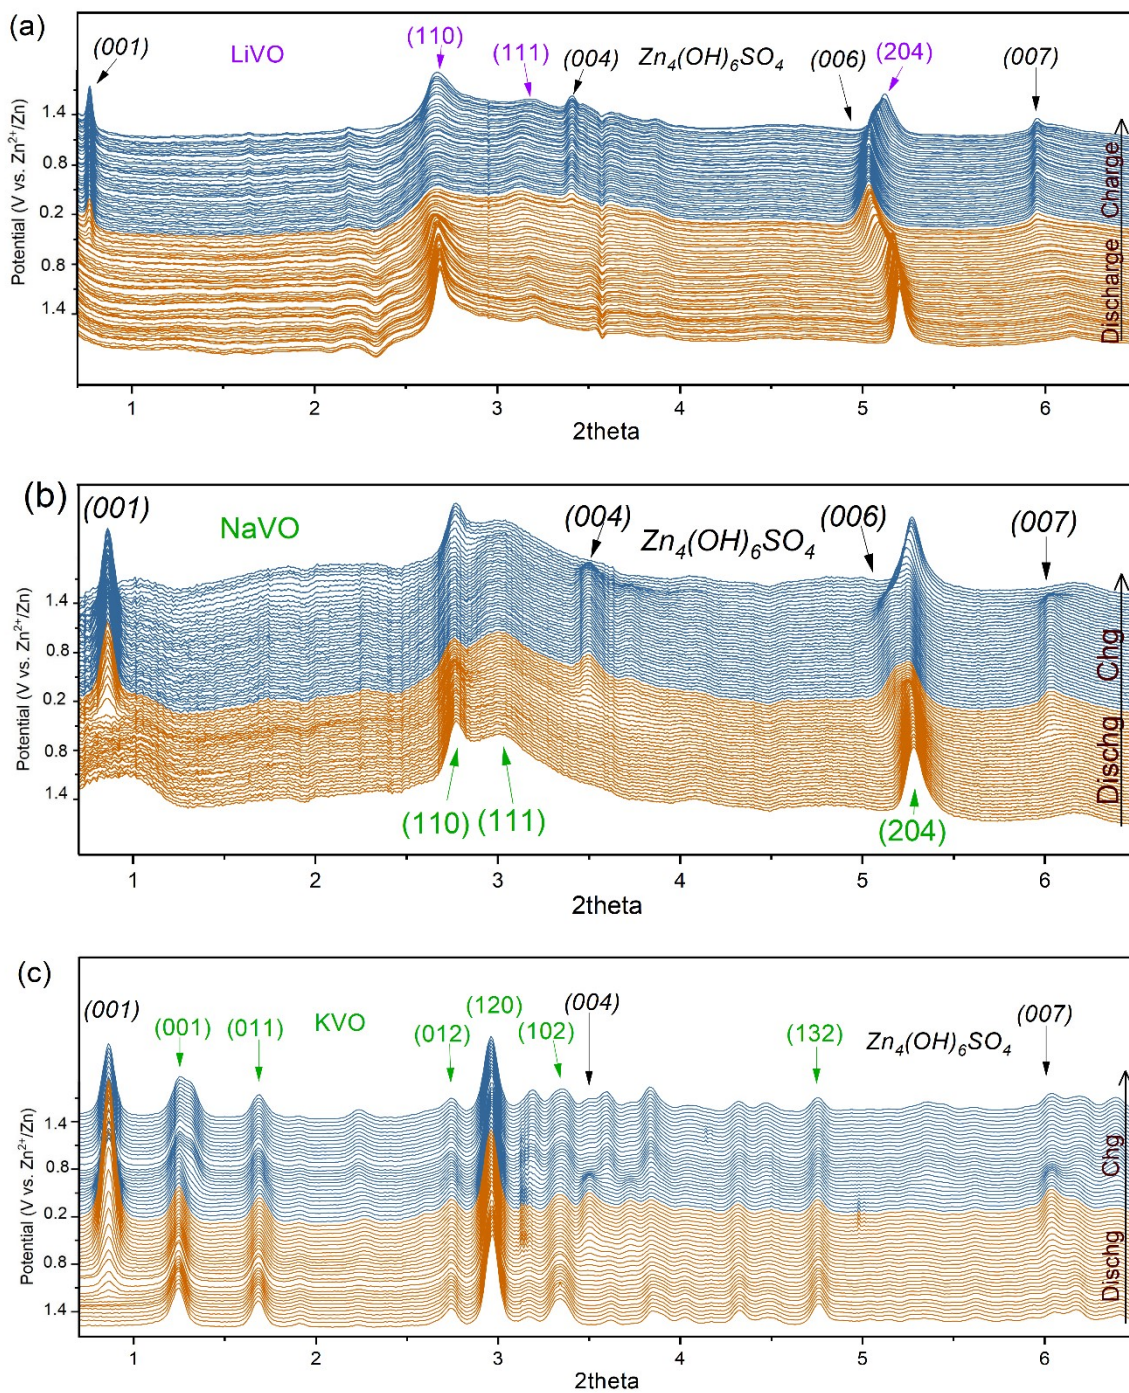

**Figure S10.** Contour plot of XRD patterns during a CV scan of (a) LiVO, (b) NaVO, and (c) KVO cathodes measured *in situ* Zn-cell (AVO peaks and  $Zn_4(OH)_6SO_4 \cdot 4H_2O$  peaks are labeled while the latter one as *Italic*).

## Supplementary Tables:

**Table S1.** Refined crystal structural parameters of LiVO material with X-ray PDF fitting with  $R_{wp}=36.8\%$ . LiVO is expressed as  $Li_x(H_y)V_3O_8 \cdot nH_2O$ , where lithium and water amount is determined from EDXS and TGA measurements.

### Refined crystal structural parameters of LiVO

| Atom | Type | x     | y     | z     | Occ. | Site | Uiso | U <sub>11</sub> | U <sub>22</sub> | U <sub>33</sub> | U <sub>13</sub> |
|------|------|-------|-------|-------|------|------|------|-----------------|-----------------|-----------------|-----------------|
| V    | V1   | 0.095 | 0.250 | 0.185 | 1.00 | 2a   | 0.17 | 0.194           | 0.013           | 0.340           | 0.201           |
| V    | V2   | 0.847 | 0.250 | 0.088 | 1.00 | 2a   | 0.04 | 0.062           | 0.031           | 0.014           | 0.025           |
| V    | V3   | 0.547 | 0.250 | 0.871 | 1.00 | 2a   | 0.13 | 0.105           | 0.020           | 0.275           | 0.118           |
| Li   | Li1  | 0.296 | 0.250 | 0.442 | 1.00 | 2a   | 0.02 | 0.004           | 0.022           | 0.045           | 0.008           |
| O    | O1   | 0.895 | 0.250 | 0.900 | 1.00 | 2a   | 0.03 | 0.005           | 0.006           | 0.064           | 0.001           |
| O    | O2   | 0.147 | 0.250 | 0.865 | 1.00 | 2a   | 0.16 | 0.073           | 0.052           | 0.331           | 0.084           |
| O    | O3   | 0.460 | 0.250 | 0.102 | 1.00 | 2a   | 0.03 | 0.007           | 0.013           | 0.065           | 0.004           |
| O    | O4   | 0.963 | 0.250 | 0.260 | 1.00 | 2a   | 0.04 | 0.051           | 0.017           | 0.053           | 0.052           |
| O    | O5   | 0.239 | 0.250 | 0.251 | 1.00 | 2a   | 0.03 | 0.007           | 0.053           | 0.025           | 0.007           |
| O    | O6   | 0.714 | 0.250 | 0.190 | 1.00 | 2a   | 0.04 | 0.003           | 0.064           | 0.038           | 0.008           |
| O    | O7   | 0.655 | 0.250 | 0.765 | 1.00 | 2a   | 0.03 | 0.015           | 0.038           | 0.038           | 0.004           |
| O    | O8   | 0.365 | 0.250 | 0.724 | 1.00 | 2a   | 0.08 | 0.027           | 0.019           | 0.196           | 0.051           |
| O    | O9   | 0.296 | 0.250 | 0.442 | 1.00 | 2a   | 0.02 | 0.004           | 0.022           | 0.045           | 0.008           |

Space group: P 21/m

a=12.453 b=3.642 c=8.664 (Å)  $\alpha=90$   $\beta=95.257$   $\gamma=90$  (°)

**Table S2.** Refined crystal structural parameters of NaVO material with X-ray PDF fitting with  $R_{wp}=27.9\%$ . NaVO is expressed as  $Na_{0.24}(H_{0.76})V_3O_8 \cdot 1.48H_2O$ , where sodium and water amount is determined from EDXS and TGA measurements.

**Refined crystal structural parameters of NaVO**

| Atom | Type | x     | y     | z     | Occ. | Site | Uiso | U <sub>11</sub> | U <sub>22</sub> | U <sub>33</sub> | U <sub>13</sub> |
|------|------|-------|-------|-------|------|------|------|-----------------|-----------------|-----------------|-----------------|
| V    | V1   | 0.614 | 0.250 | 0.892 | 1.00 | 2e   | 0.12 | 0.118           | 0.010           | 0.173           | 0.097           |
| V    | V2   | 0.852 | 0.250 | 0.197 | 1.00 | 2e   | 0.03 | 0.019           | 0.008           | 0.054           | 0.024           |
| V    | V3   | 0.914 | 0.250 | 0.867 | 1.00 | 2e   | 0.02 | 0.023           | 0.005           | 0.026           | 0.014           |
| Na   | Na1  | 0.635 | 0.474 | 0.469 | 1.00 | 4f   | 0.01 | 0.013           | 0.013           | 0.013           | 0.003           |
| Na   | Na2  | 0.582 | 0.420 | 0.490 | 1.00 | 4f   | 0.02 | 0.020           | 0.020           | 0.020           | 0.004           |
| O    | O1   | 0.697 | 0.250 | 0.151 | 1.00 | 2e   | 0.03 | 0.078           | 0.011           | 0.003           | 0.015           |
| O    | O2   | 0.999 | 0.250 | 0.434 | 1.00 | 2e   | 0.11 | 0.177           | 0.008           | 0.190           | 0.155           |
| O    | O3   | 0.771 | 0.250 | 0.982 | 1.00 | 2e   | 0.02 | 0.026           | 0.013           | 0.042           | 0.032           |
| O    | O4   | 0.813 | 0.250 | 0.685 | 1.00 | 2e   | 0.06 | 0.120           | 0.004           | 0.071           | 0.063           |
| O    | O5   | 0.027 | 0.250 | 0.105 | 1.00 | 2e   | 0.12 | 0.325           | 0.000           | 0.079           | 0.173           |
| O    | O6   | 0.174 | 0.250 | 0.780 | 1.00 | 2e   | 0.29 | 0.705           | 0.024           | 0.052           | 0.185           |
| O    | O7   | 0.560 | 0.250 | 0.738 | 1.00 | 2e   | 0.05 | 0.004           | 0.069           | 0.057           | 0.009           |
| O    | O8   | 0.404 | 0.250 | 0.018 | 1.00 | 2e   | 0.10 | 0.012           | 0.010           | 0.259           | 0.051           |
| O    | O9   | 0.434 | 0.389 | 0.500 | 1.00 | 4f   | 0.02 | 0.023           | 0.023           | 0.023           | 0.005           |

Space group: P 21/m

a=10.214 b=3.602 c=9.312 (Å)  $\alpha=90$   $\beta=100.369$   $\gamma=90$  (°)

**Table S3.** Refined crystal structural parameters of KVO material with X-ray PDF fitting with  $R_{wp}=20.6\%$ . KVO is expressed as  $K_{0.9}(H_{0.1})V_3O_8 \cdot 0.04H_2O$ , where potassium and water amount is determined from EDXS and TGA measurements.

**Refined crystal structural parameters of KVO**

| Atom | Type | x     | y     | z     | Occ. | Site | Uiso | U <sub>11</sub> | U <sub>22</sub> | U <sub>33</sub> | U <sub>13</sub> |
|------|------|-------|-------|-------|------|------|------|-----------------|-----------------|-----------------|-----------------|
| V    | V1   | 0.455 | 0.055 | 0.691 | 1.00 | 4f   | 0.01 | 0.007           | 0.010           | 0.012           | 0.004           |
| V    | V2   | 0.069 | 0.750 | 0.423 | 1.00 | 2e   | 0.01 | 0.005           | 0.008           | 0.008           | 0.001           |
| K    | K1   | 0.032 | 0.750 | 0.931 | 1.00 | 2e   | 0.04 | 0.049           | 0.013           | 0.040           | 0.028           |
| O    | O1   | 0.107 | 0.085 | 0.756 | 1.00 | 4f   | 0.01 | 0.010           | 0.023           | 0.011           | 0.004           |
| O    | O2   | 0.328 | 0.591 | 0.503 | 1.00 | 4f   | 0.02 | 0.011           | 0.043           | 0.014           | 0.001           |
| O    | O3   | 0.387 | 0.056 | 0.146 | 1.00 | 4f   | 0.02 | 0.048           | 0.014           | 0.003           | 0.005           |
| O    | O4   | 0.070 | 0.025 | 0.400 | 1.00 | 2e   | 0.01 | 0.012           | 0.007           | 0.009           | 0.009           |
| O    | O5   | 0.403 | 0.750 | 0.253 | 1.00 | 2e   | 0.02 | 0.029           | 0.017           | 0.010           | 0.016           |

Space group: P 21/m

a=4.985 b=8.388 c=7.675 (Å)  $\alpha=90$   $\beta=97.043$   $\gamma=90$  (°)

**Table S4.** Physical properties of monovalent ions.<sup>1</sup>

| Ions            | Ionic radius (pm) | Hydrated radius (pm) | Water number in shell | Hydration enthalpy (kJ mol <sup>-1</sup> ) | Ionic mobility (ohm <sup>-1</sup> cm <sup>2</sup> mol <sup>-1</sup> ) |
|-----------------|-------------------|----------------------|-----------------------|--------------------------------------------|-----------------------------------------------------------------------|
| Li              | 76                | 340                  | 5.2                   | -506                                       | 33.5                                                                  |
| Na              | 102               | 276                  | 3.5                   | -406                                       | 43.5                                                                  |
| K               | 138               | 232                  | 2.6                   | -330                                       | 64.5                                                                  |
| NH <sub>4</sub> | 148               | N.A.                 | 2.4                   | N.A.                                       | N.A.                                                                  |

## Reference:

- (a) Wang, Y.; Weinstock, I. A., Polyoxometalate-decorated nanoparticles. *Chemical Society Reviews* **2012**, *41* (22), 7479-7496; (b) Marcus, Y., Thermodynamics of solvation of ions. Part 5.—Gibbs free energy of hydration at 298.15 K. *Journal of the Chemical Society, Faraday Transactions* **1991**, *87* (18), 2995-2999; (c) Zhong, C.; Deng, Y.; Hu, W.; Qiao, J.; Zhang, L.; Zhang, J., A review of electrolyte materials and compositions for electrochemical supercapacitors. *Chemical Society Reviews* **2015**, *44* (21), 7484-7539.
